# Supplementary material for: Effect of Treadmill Perturbation-Based Balance Training on Fall Rates in Community-Dwelling Older Adults: A Randomized Clinical Trial
Source: PubMed Central journal article supplement (PMC10119738; doi:10.1001/jamanetworkopen.2023.8422), 2023-04-20
Supplement: jamanetwopen-e238422-s003.pdf [file jamanetwopen-e238422-s003.pdf]

## Data Sharing Statement

Nørgaard. Effect of Treadmill Perturbation-Based Balance Training on Fall Rates in Community-Dwelling Older Adults. *JAMA Netw Open*. Published April 20, 2023.  
doi:10.1001/jamanetworkopen.2023.8422

### Data

**Data available:** Yes

**Data types:** Deidentified participant data

**How to access data:** Email: [Jens.noergaard@rn.dk](mailto:Jens.noergaard@rn.dk)

**When available:** With publication

### Supporting Documents

**Document types:** None

### Additional Information

**Who can access the data:** Anyone requesting the data

**Types of analyses:** For any purpose

**Mechanisms of data availability:** With investigator support
